# Supplementary material
Source: Research Square preprint supplement (doi:10.21203/rs.3.rs-9098407/v1)
Supplement: Supplementary file 2 [file 30a4e008d12c106265756880.docx]

**Bridging the Gap in Long COVID Care: Identifying Core Competencies for Primary Care Curriculum Development and Evaluation: Supplementary Materials**

# Appendix 2. Quantitative Survey Analysis Results

**Table 1.** Average Group Rankings Reflecting Group Opinions on PCP Training Priorities (1 = highest priority; 13 = lowest priority)

|  | Experts | PCPs | IWLC | Family/  Community | Total |
| --- | --- | --- | --- | --- | --- |
| Symptom recognition and variable symptom presentations of long COVID | 2 | 1 | 2 | 3 | 1 |
| Overview of conditions associated with long COVID that require management | 1 | 6 | 1 | 2 | 2 |
| Non-pharmaceutical treatment options available and appropriate for long COVID | 5 | 3 | 5 | 6 | 3 |
| Strategies for self-management of long COVID | 3 | 4 | 7 | 4 | 4 |
| Diagnostic criteria | 10 | 5 | 6 | 1 | 5 |
| Pharmaceutical treatment options available and appropriate for long COVID | 4 | 2 | 11 | 8 | 6 |
| Patient-centered communication and symptom validation strategies | 6 | 8 | 3 | 10 | 7 |
| Mental health support for long COVID patients | 8 | 7 | 8 | 9 | 8 |
| Psychosocial and emotional impacts of long COVID | 7 | 9 | 10 | 11 | 9 |
| Referring and coordinating with specialists | 9 | 12 | 4 | 7 | 10 |
| Understanding pathophysiology and risk factors for long COVID | 11 | 10 | 13 | 5 | 11 |
| Documentation for worker's compensation claims, disability and/or accommodations | 13 | 11 | 9 | 12 | 12 |
| Addressing long COVID in pediatric populations | 12 | 13 | 12 | 13 | 13 |

PCPs: Primary Care Clinicians; IWLC: Individuals with Long COVID

**Table 2.** Rating knowledge areas on their importance for PCPs in managing long COVID by group (5 = critical; 1 = not important)

| Group | | Long COVID prevalence and risk factors | Pathophysiology of long COVID | Differential diagnosis for long COVID symptoms | Evidence-based treatments for long COVID | Psychosocial impacts of long COVID on patients | Strategies for long-term symptom management | Referral pathways for specialist care | Communicating prognosis and expectations with patients | Paperwork for workers' compensation and accommodations |
| --- | --- | --- | --- | --- | --- | --- | --- | --- | --- | --- |
| Experts & PCPs | |  |  |  |  |  |  |  |  |  |
|  | Mean | **3.00** | **2.73** | **3.73** | **3.67** | **3.87** | **4.20** | **3.53** | **3.67** | **3.47** |
| Median | 3.00 | 3.00 | 4.00 | 4.00 | 4.00 | 4.00 | 4.00 | 4.00 | 4.00 |
| Mode | 3.00 | 3.00 | 4.00 | 4.00 | 4.00 | 4.00 | 4.00 | 4.00 | 4.00 |
| IWLC & Family/ Community | |  |  |  |  |  |  |  |  |  |
|  | Mean | **4.27** | **4.55** | **4.00** | **4.73** | **4.91** | **4.64** | **4.45** | **4.45** | **4.55** |
| Median | 5.00 | 5.00 | 4.00 | 5.00 | 5.00 | 5.00 | 4.00 | 5.00 | 5.00 |
| Mode | 5.00 | 5.00 | 4.00 | 5.00 | 5.00 | 5.00 | 4.00 | 5.00 | 5.00 |
| Overall Means by Group | |  |  |  |  |  |  |  |  |  |
|  | Experts | 3.33 | 2.83 | 4.17 | 3.33 | 4.17 | 4.33 | 3.67 | 3.67 | 4 |
|  | PCPs | 2.77 | 2.67 | 3.44 | 3.89 | 3.67 | 4.11 | 3.45 | 3.67 | 3.11 |
|  | IWLC | 4.12 | 4.5 | 3.75 | 4.63 | 4.88 | 4.5 | 4.38 | 4.375 | 4.5 |
|  | Family/  Community | 4.66 | 4.67 | 4.67 | 5 | 5 | 5 | 4.67 | 4.67 | 4.67 |

PCPs: Primary Care Clinicians; IWLC: Individuals with Long COVID

**Table 3.** Ranking types to be prioritized in training programs for managing long COVID (1 = highest priority; 6 = lowest priority)

|  | | Prescription medications | Supplements | Ancillary services (e.g., physical therapy, speech therapy) | Therapy/ counseling | Other adjunct therapies (acupuncture, massage, hydrotherapy) | Lifestyle medicine (e.g., nutrition, sleep hygiene, stress management) |
| --- | --- | --- | --- | --- | --- | --- | --- |
| Experts & PCPs | |  |  |  |  |  |  |
|  | Mean | **3.00** | **4.27** | **3.33** | **3.40** | **4.60** | **2.40** |
| Median | 3.00 | 5.00 | 3.00 | 3.00 | 5.00 | 2.00 |
| Mode | 1.00 | 6.00 | 3.00 | 4.00 | 5.00 | 1.00 |
| IWLC & Family/Community | |  |  |  |  |  |  |
|  | Mean | **4.73** | **4.27** | **2.82** | **3.64** | **3.00** | **2.55** |
| Median | 6.00 | 5.00 | 3.00 | 4.00 | 2.00 | 2.00 |
| Mode | 6.00 | 5.00 | 4.00 | 4.00 | 2.00 | 1.00 |
| Overall Means by Group | |  |  |  |  |  |  |
|  | Experts | 2.50 | 3.83 | 3.00 | 4.00 | 5.00 | 2.67 |
|  | PCPs | 3.33 | 4.56 | 3.56 | 3.00 | 4.33 | 2.22 |
|  | IWLC | 4.88 | 4.13 | 2.63 | 3.50 | 2.88 | 3.00 |
|  | Family/  Community | 4.33 | 4.67 | 3.33 | 4.00 | 3.33 | 1.33 |

PCPs: Primary Care Clinicians; IWLC: Individuals with Long COVID

# **Appendix 3.** Qualitative Matrix Analysis Results

|  | **Diagnostics** | **Pathophysiology** | **Symptom recognition** | **Associated conditions** | **Self-management strategies** | **Pharmaceutical treatments** | **Non-pharmaceutical treatments** |
| --- | --- | --- | --- | --- | --- | --- | --- |
| **Individuals with Long COVID (IWLC)** | Diagnosis is challenging due to uncertainty, a lack of consensus, and the expectation of a positive COVID-19 test result. Diagnosis helps initiate treatment, but it is not yet accepted by all insurance providers, making it less helpful. IWLC are frustrated with delays around diagnosis, referrals, and the 12-week requirement. | NA – not discussed | Good experiences came from PCPs who were able to recognize symptoms on their own and helped advocate for Long COVID diagnosis and next steps. Many times, symptoms are dismissed. | Relevant at all stages of long COVID care. Identified as a main priority for education PCPs. | Pacing was deemed very important as an alternative to PT/VT/exercise therapy, and it was clear from initial surveys that PCPs would benefit greatly from learning pacing techniques to share with patients. | issues with pharmacological treatments (e.g., medication sensitivity, expensive, dealing with insurance, medications not working, medications potentially leading to addiction), and were looking forward to more non-pharmaceutical options (e.g., acupuncture, craniosacral therapy, Eastern medicine). | IWLC felt this should be a priority but warned that PCPs should “be careful” about who they refer to for exercise-related treatments (e.g., severe long COVID may not be well suited for exercise treatments that lead to PEM). |
| **Family** | Frustration primarily around the 12-week wait time associated with the long COVID diagnosis. | This was a bigger concern for this group. They acknowledged that, as a “third party,” they want to be able to better understand long COVID and what is happening with their loved ones. It can also help alleviate feelings of helplessness due to a lack of treatment options. | Shared more experiences of lack of belief in COVID/Long COVID also leads to a lack of recognition of symptoms and seeing symptoms being dismissed. They needed to take on a more prominent advocacy role. | One participant wanted more communication around the vascular impacts of long COVID | Sticking to treatment plans consistently is always a challenge, and it's a great role for family/friends' support. Discussed like other chronic illnesses. However, noting the emotional and physical burden this can still be for family/friends. | No specific treatments were discussed with this group, but they did discuss the involvement of caregivers/family/friends in treatment plans. This would be unique to each patient, but they did like the idea of PCPs initiating the conversation with patients if they have family/friends who can help support them, which may help the patient feel more comfortable reaching out to friends/family. | |
| **PCP** | PCPs see a large number of patients with various symptoms, so having diagnostic criteria would help them feel more confident, including LC in the patient’s problem list. One participant noted that having the diagnosis in documentation for insurance purposes may be helpful, but the treatment program does not rely heavily on the diagnosis. It would be beneficial to have diagnostic criteria, but the current ones seem to be lacking. | NA – not discussed | PCPs were keen on more symptom recognition training to help identify patients with LC, including “upstream” or “downstream” conditions that they could be on the lookout for and link to LC. | PCPs acknowledged that the associated conditions would be treated the same regardless of their connection to LC, so they did not consider this a priority. Still, it may be helpful to know what could be connected for recognition and treatment options that are more holistic. | PCPs wanted the ability to empower patients to self-manage their symptoms, but also felt that this was a step to be taken after reviewing and understanding the various treatment options, including pharmaceutical and non-pharmaceutical approaches. | PCPs wanted more training on the pharmaceutical options for long COVID and their associated benefits and risks. | PCPs felt more comfortable with non-pharmaceutical treatment options available and agreed that this priority made more sense for patients, as these would be more likely to provide whole-person care. |
| **Experts** | Did not see this as a priority because the NASEM 2024 definition is sufficient. There are concerns that too rigid of criteria would lead to missed diagnoses. | NA – not discussed | Highlighted this as a more important function over the reliance on diagnostics. | Recognized that identifying associated conditions and their LC presentations (e.g. headache patterns) can inform referrals and treatment conversations. | See self management, especially pacing, as crucial for improving quality of life. Highlighted how PCPs should learn how to frame these to patients to encourage buy-in and demonstrate their value. | Surprised this was low for patients and wondered if the rationale was due to lack of curative treatment options. Felt training in this area more important for PCPs. Highlighted need to be tactful when discussing medications. | Felt that non-pharmaceutical options should be exhausted before moving on to pharmaceuticals. |
| **Researchers Critical Reflections** | There appears to be some conflict as experts noted earlier diagnosis leads to better prognosis while patients and families see this issue being part of the 12-week post COVID diagnosis criteria.  PCPs may be able to implement some symptom management options prior to official diagnosis. | It was interesting that only the family members prioritized this topic while everyone else prioritized treatment and symptom management. They seemed more focused on the public health and community impacts of COVID-19/LC, potentially to reduce the number of people experiencing LC. | Given the 200+ symptoms associated with LC, it makes sense that PCPs would be hesitant to associate symptom presentations with LC. Training for this is a priority and can focus on more common LC symptoms but reference less common presentations, too. | It is interesting to see how important this was across patients, family, and experts but the PCPs noting that this is less important of a training as they know how to treat these potential associated conditions regardless of LC. A training may not need to get too in the weeds on these but how to focus on whole person approaches knowing which conditions may be linked. | Emphatically supported across all groups. Potentially highlights how the things that can be really impactful can be easily incorporated into primary care and avoid the long specialists’ wait times. PCPs should feel equipped to discuss self management strategies and PEM/pacing for patients. This could also align with the 12-week diagnosis wait where patients want some treatment options sooner. | This was harder to tease apart in our data collection as some responses framed it as “important to treatment” and some as “important for training PCPs.” Overall, training is important but this should be utilized later in the treatment plan. | There was a lot of support for these kinds of treatments. The difficulty is more in accessibility and availability of these and their ability to understand the complexity of someone living with LC. |

|  | **Mental health & emotional impacts** | **Referrals and coordinating with specialists** | **Validation & Patient-centered communication** | **Documentation for workers’ comp and accommodations** | **Pediatric population** | **Research/staying up to date** | **Time constraints on PCP visits** |
| --- | --- | --- | --- | --- | --- | --- | --- |
| **Individuals with Long COVID (IWLC)** | Did want specialist referrals for mental health. Did not see PCP role in emotional/mental health. | PCPs weren’t familiar with LC, so it seemed like only specialists could help. But they wanted the “right” specialist who is familiar with LC and won’t disregard symptoms. PCPs should know specialist options. It can be “exhausting” to go to different medical teams. | Highlighted that most doctors see them on their good days, so PCPs need to trust that even though participants look fine now, they’re not doing well internally or on other days. Emphasized wanting PCPs who actively listen, show empathy. | Acknowledged that this was something they could not do on their own if your PCP/clinician wasn’t willing. Good visit notes important so a reviewer can look at one visit’s note and get the complete picture. SSDI and job accommodation as support for pacing. | Acknowledged that this group was mainly adults who did not have much experience with pediatric long COVID. | Patients are familiar with needing to do their own research on LC and potential treatments, especially when PCPs aren’t well-versed in LC. They use research and online groups to advocate for themselves in medical settings (?). | Given the short visits with PCPs, patients need to prioritize which symptoms to cover, taking more mental energy which they may not have due to LC symptoms. |
| **Family** | Acknowledged the emotional and physical exhaustion they experience in advocating, supporting their family. | There was unclear understanding about the role of PCPs and how involved they can/should be in managing LC. Even when they did make referrals, the wait times were so long and not much communication while waiting. | Discussed the various communication approaches and that no one size fits all for any patient and/or caregiver. Suggested that communication tips would be helpful for this situation to help guide PCPs. | NA – not discussed | NA – not discussed | Recognized the challenges with PCPs staying fully up-to-date with quickly emerging research but would like a resource for clinicians to improve treatment equity. | One participant shared the administrative struggles of balancing LC visits with typical PCP visits when the LC patients seemed to need longer and more frequent visits. |
| **PCP** | PCPs discussed being the first line of conversations around how physical symptoms can be exacerbated by mental health symptoms. Validating their symptoms and experiences was a first step in creating a rapport to allow them to discuss mental health. | PCPs felt very comfortable making referrals and coordinating care and said the hardest part was setting expectations with patients. They also felt that many specialists don’t have the LC training either and patients were unsatisfied and unheard. They wanted tools for determining when to refer and to which specialists and how to have those conversations with patients. | Recommended using trauma-informed care and focus on active listening and specific verbal and body language. Also the benefit of shared decision making conversations. PCPs did highlight the need for additional training in this and the need to reflect on emotions and biases. Acknowledge how difficult this can be with the short visit time to listen, validate, and treat within 15 minutes. | PCPs felt like they have reasonable training and experience in this. But mainly acknowledged the uncertainty of symptoms and lack of diagnostic tools are what made this difficult to achieve. Asked for examples of language used for LC to help guide those sections. | NA – not discussed | Some PCPs will do their own research in addition to reading literature brought in by patients, leading to data-informed discussions of risks and typical use before deciding on an intervention. PCPs would like resources to find the most up-to-date research and how to discuss negative or null studies with patients. | One PCP shared how important it was to discuss with patients the limited time in visits and the need for follow-ups to continue discussing treatment plan(s). |
| **Experts** | Focus on validating experiences to lead into communication around mental health. Also focused on supporting mental health is clear prognosis and realistic treatment goals and the journey of living with chronic illness. | Noted specialists just treat symptoms and that PCPs are already equipped to do this. Referrals can have long delays and not be a positive experience for patients. Prefer to empower PCPs. | Highlighted need for communication strategies to build confidence in managing long COVID. Focused on shared decision making, managing expectations and how to discuss the unclear prognosis of LC. Part of communication is to build trust and validation and shared examples. Also highlighted the need for PCPs as the “home base” for all support. | Felt that the general documentation skills apply and clinicians either feel comfortable and do it or typically avoid this kind of work regardless of condition. Suggested training on the lack of clear diagnostics. | A pediatric specialist noted that this may have been less of a priority due to a primarily adult-focused clinician pool but that many of these topics are still broadly applicable for pediatrics making it an “umbrella” topic. | NA – not discussed | Identified time management as a challenge; in LC clinics, patients can be seen for multiple hour-long visits, but primary care settings usually have more time restrictions. Experts also acknowledged that scheduling follow-up appointments for mid-day and via telehealth if possible may help patients with PEM and other LC symptoms. |
| **Researchers Critical Reflections** | PCPs and experts emphasized PCPs’ role in beginning the conversation with patients on mental health impacts, but patients seemed to already be aware of those impacts and wanted to talk more in-depth with a mental health specialist, so they focused on referrals to those specialists instead of PCPs filling that role. More tailored mental health information could be offered by PCPs depending on where patients are in their LC journey. | Based on patients’ experiences with specialist referrals, more education to patients and caregivers on referral workflows and the associated wait times would help set appropriate expectations. There seems to be a disconnect to what patients think the specialist role is. There does need to be more PCP education on when, who, and how to refer to which specialists for long COVID and how to communicate this with patients. | This was highlighted as an important part of the PCP/patient relationship. Interesting the community/family members highlighted that “patient centered communication” can look very different for each patient. PCPs could benefit from tips and tricks from long COVID experts on ways to incorporate that validating language into their assessments. | Across groups, those who initially ranked documentation high in importance usually had personal experience with the difficulty of SSDI, medical reviews, and paperwork. An interesting aspect was that as those individuals shared their experience, the others in the group’s opinion changed and thought this should be raised in importance for training. | This wasn’t discussed too much as it was routinely ranked low and many participants were adults/see adult patients. More work can be done on talking to folks specifically who had long COVID as a pediatric patient and/or see pediatric patients with or without long COVID. | This is a major hurdle for primary care and those treating patients with long COVID to keep up research on top of all their other commitments. These groups had lots of suggestions about how to support PCPs with toolkits, links, and accurate language to discuss research with patients. | Visit lengths and availability may be limited by clinic policy and logistics, so clinic leadership will likely be involved in adjusting schedules for LC visits. |
